# Supplementary material for: Shroom3-Rock interaction and profibrotic function: Resolving mechanism of an intronic CKD risk allele
Source: PubMed Central journal article supplement — bioRxiv. 2024 Nov 23:2024.11.22.624409. Preprint. [Version 1] doi: 10.1101/2024.11.22.624409 (PMC11601673; doi:10.1101/2024.11.22.624409), 2024-11-23

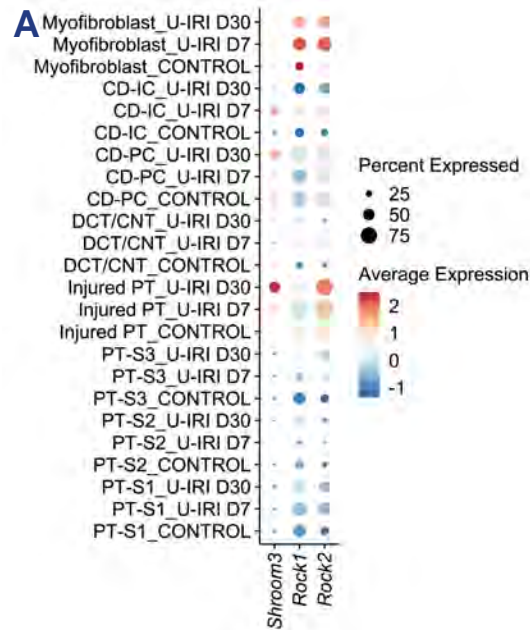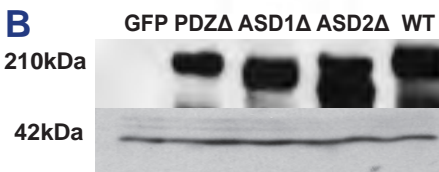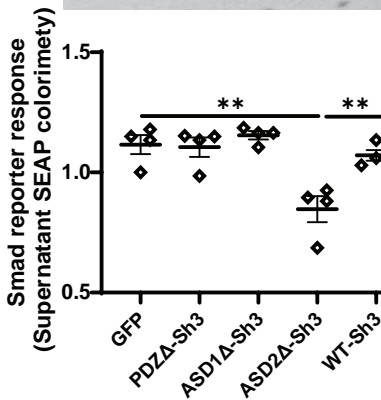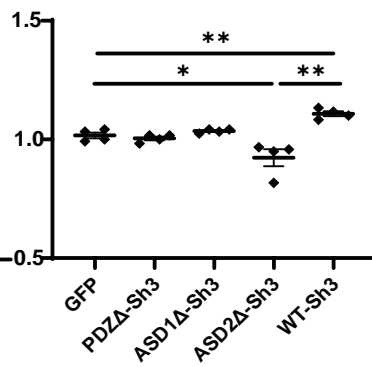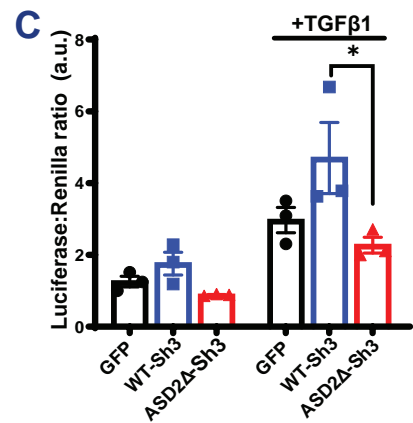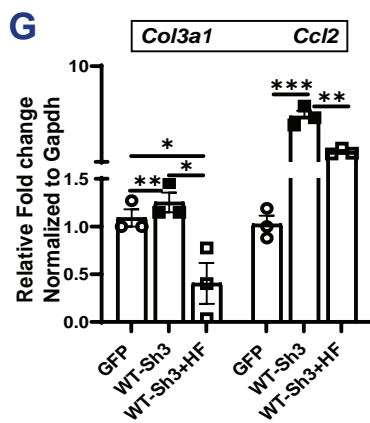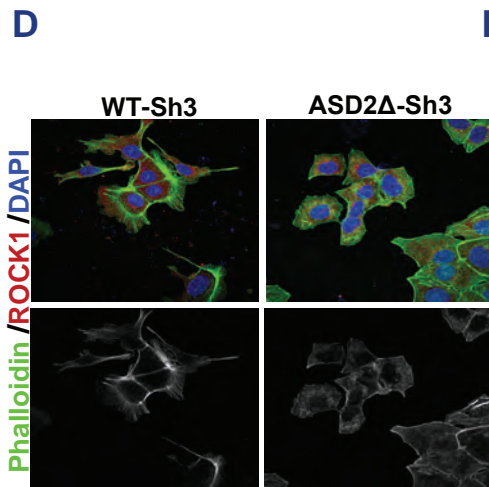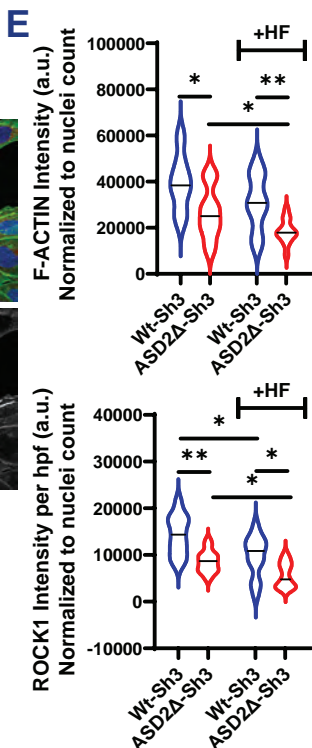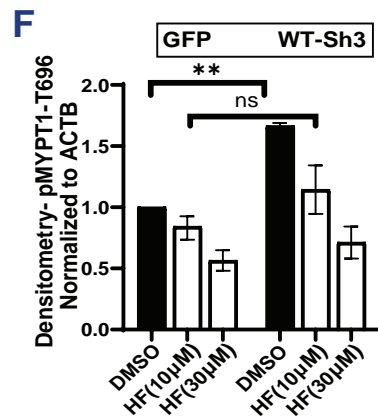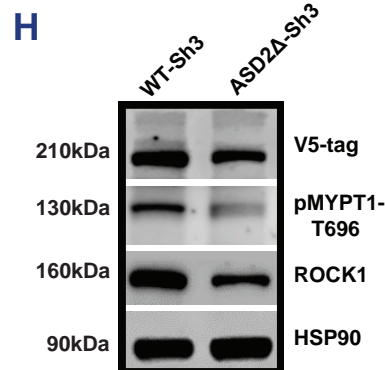

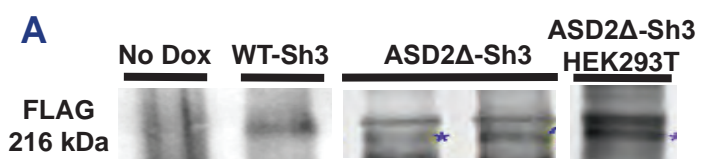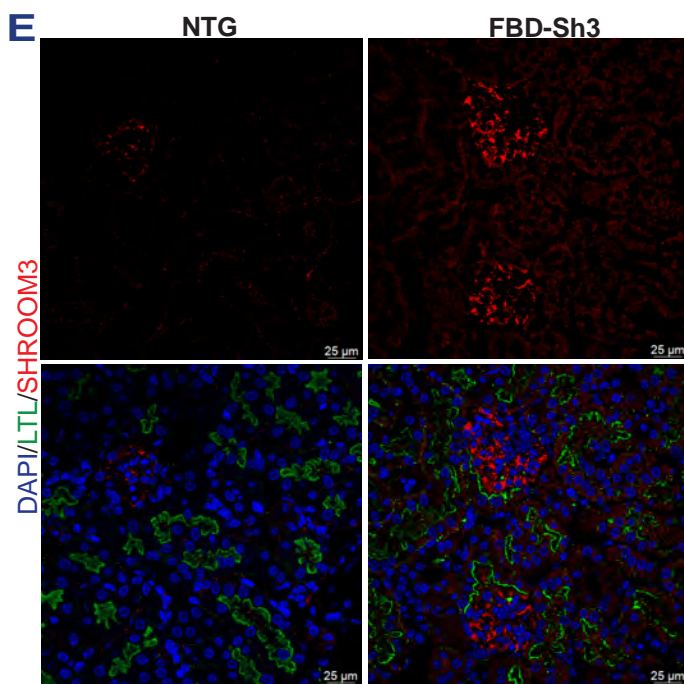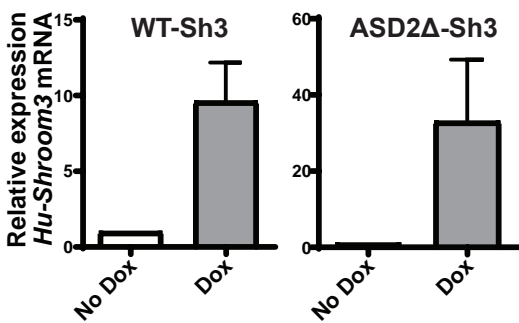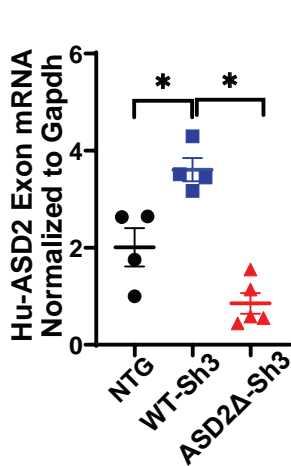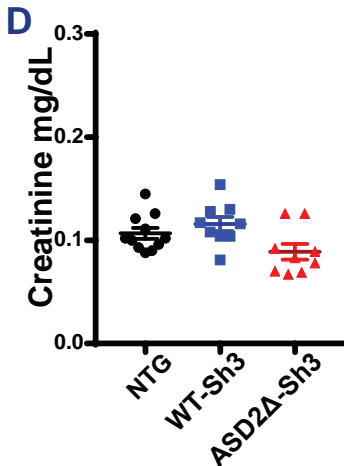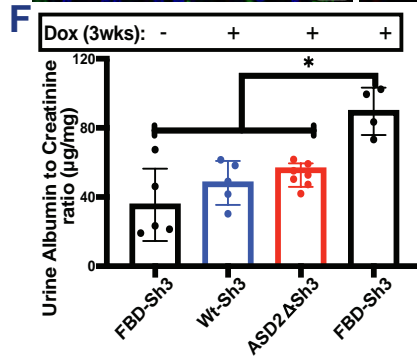

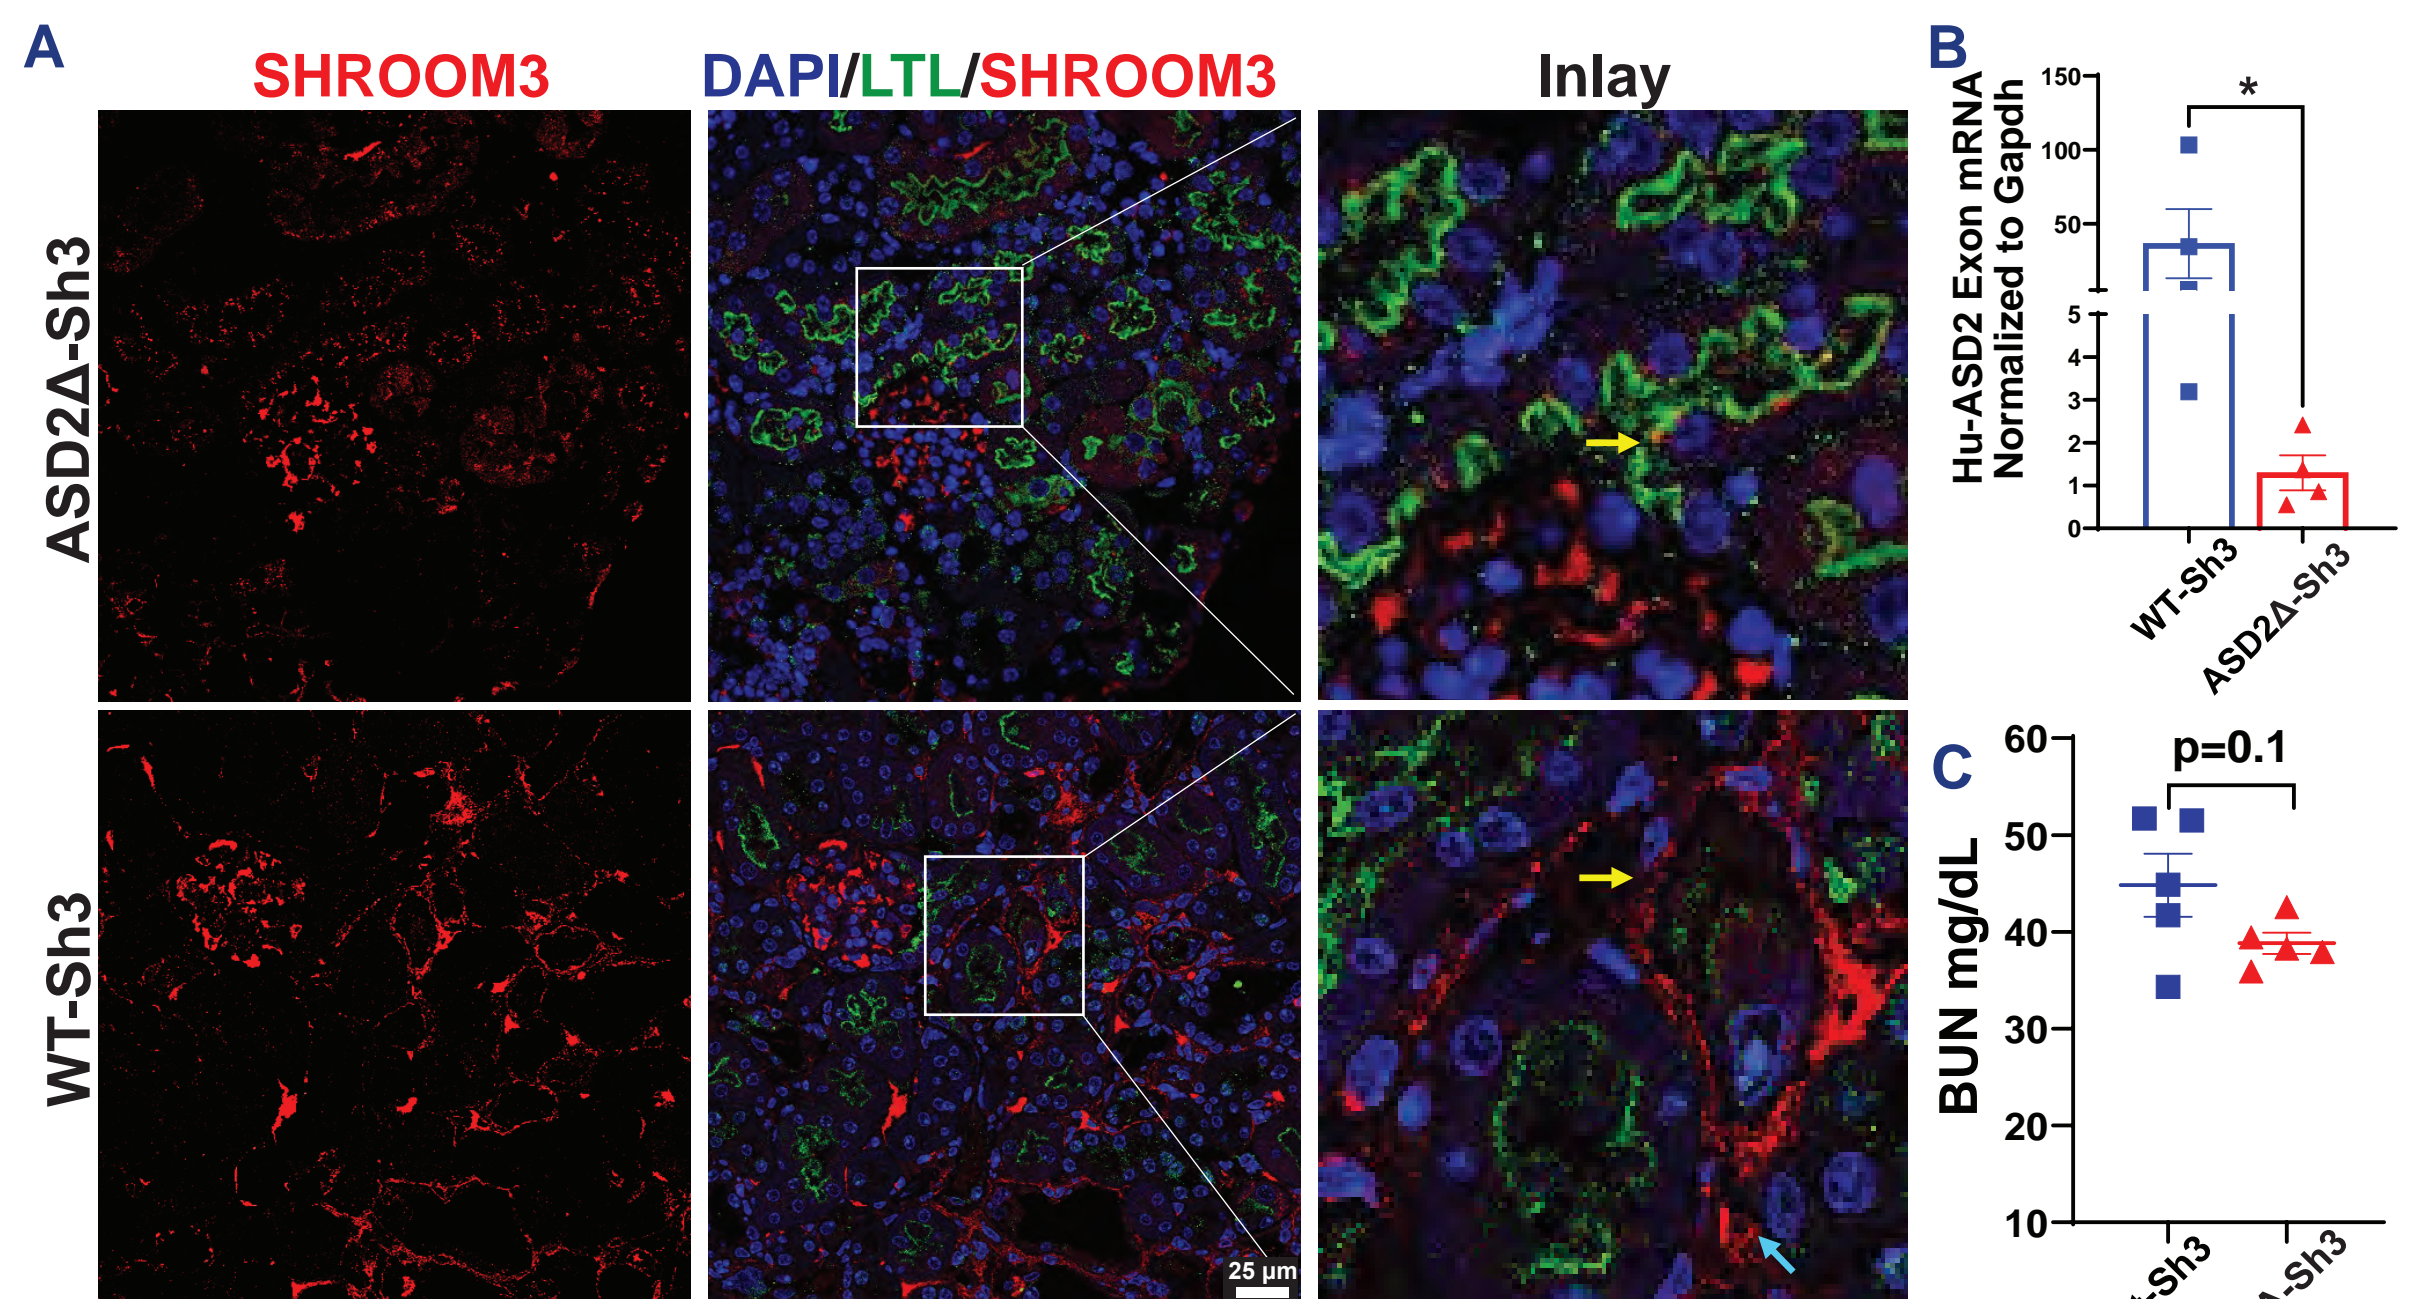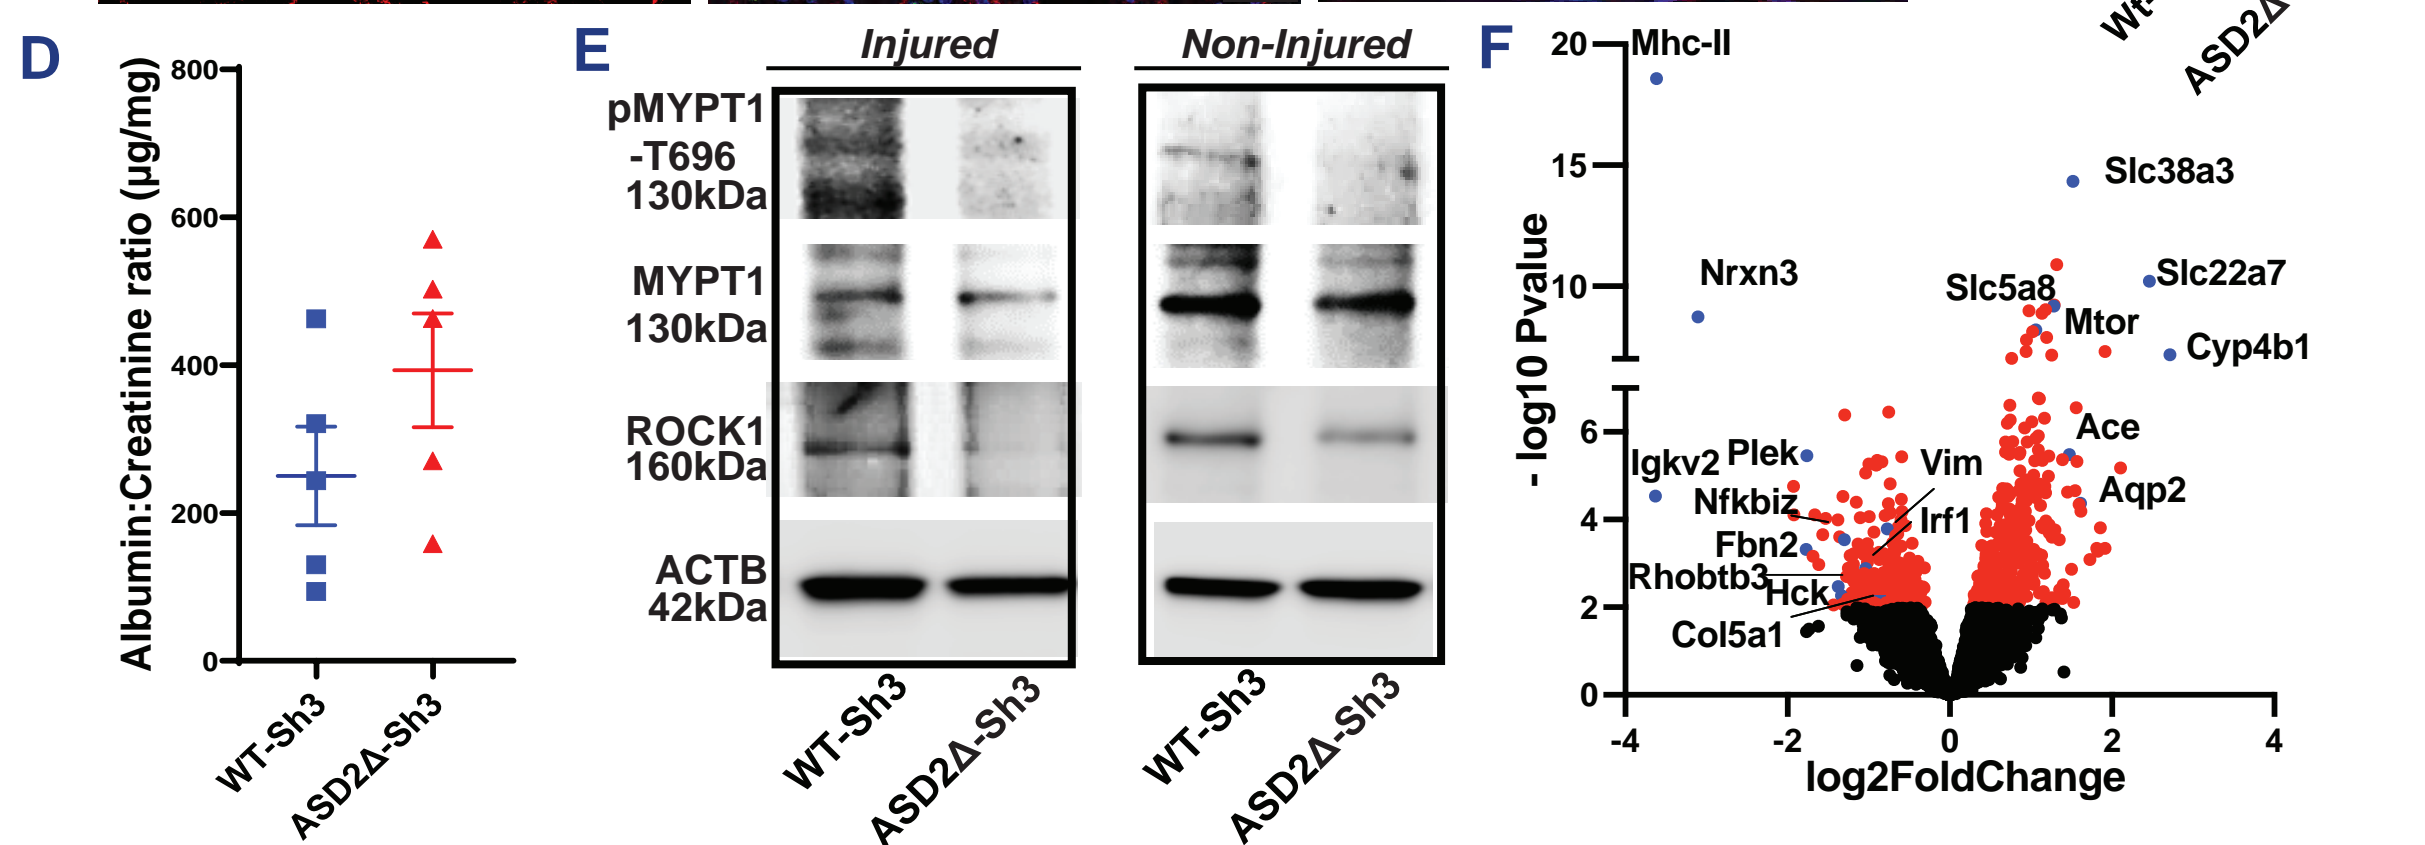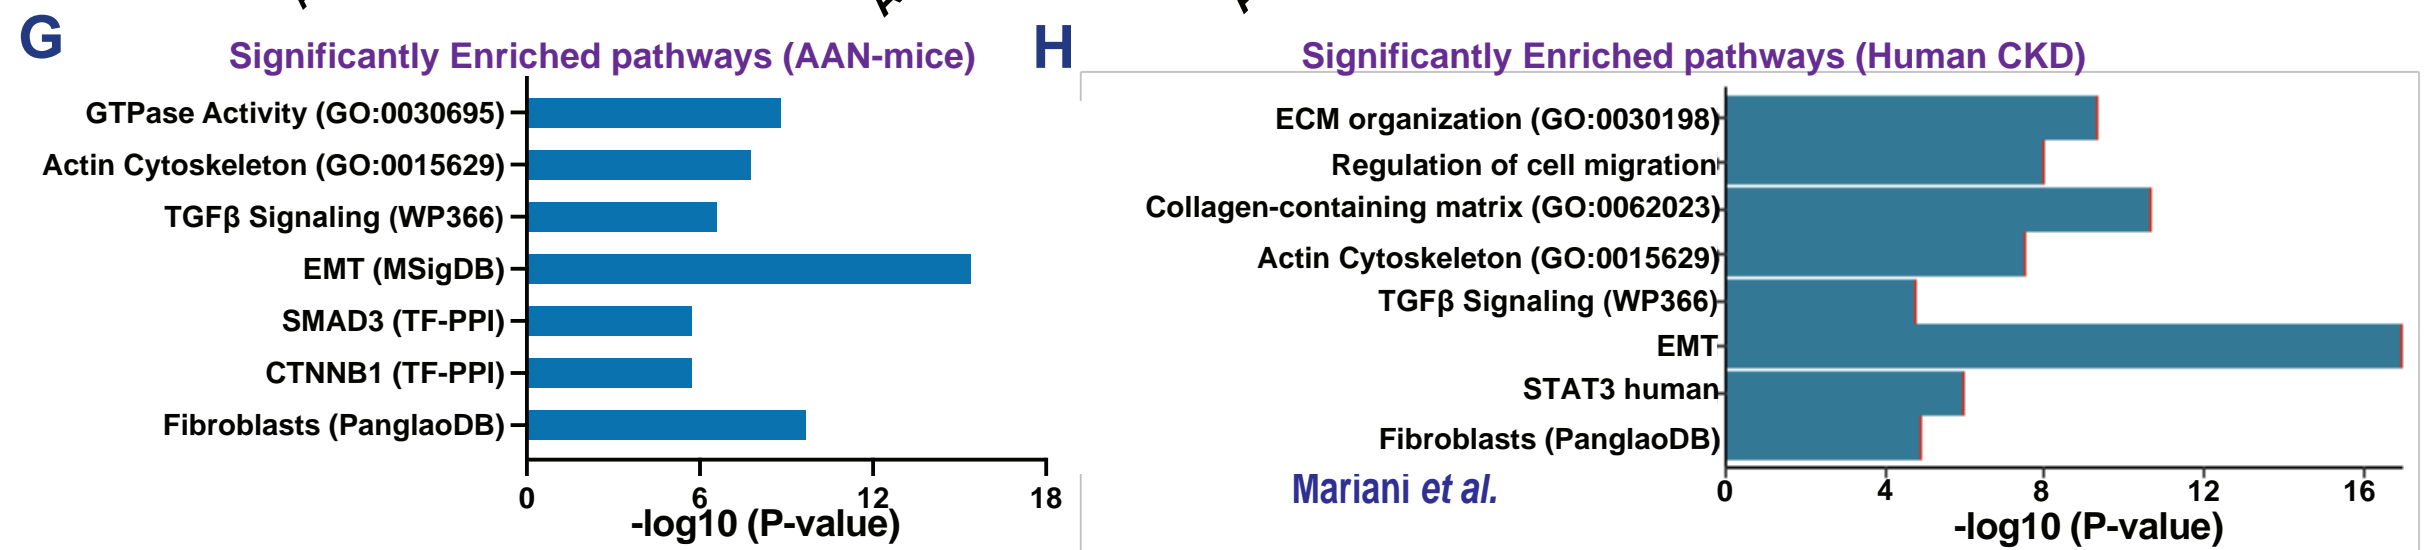

**A**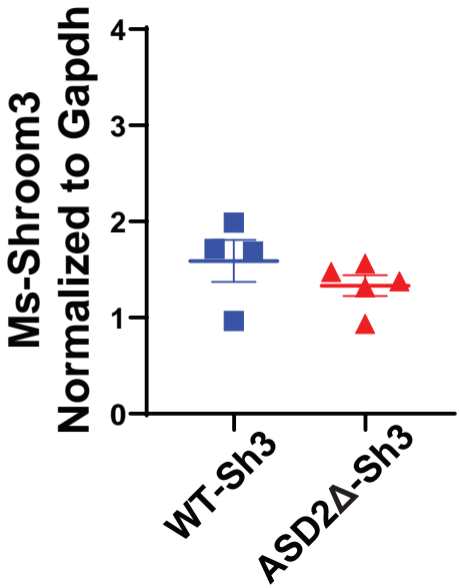

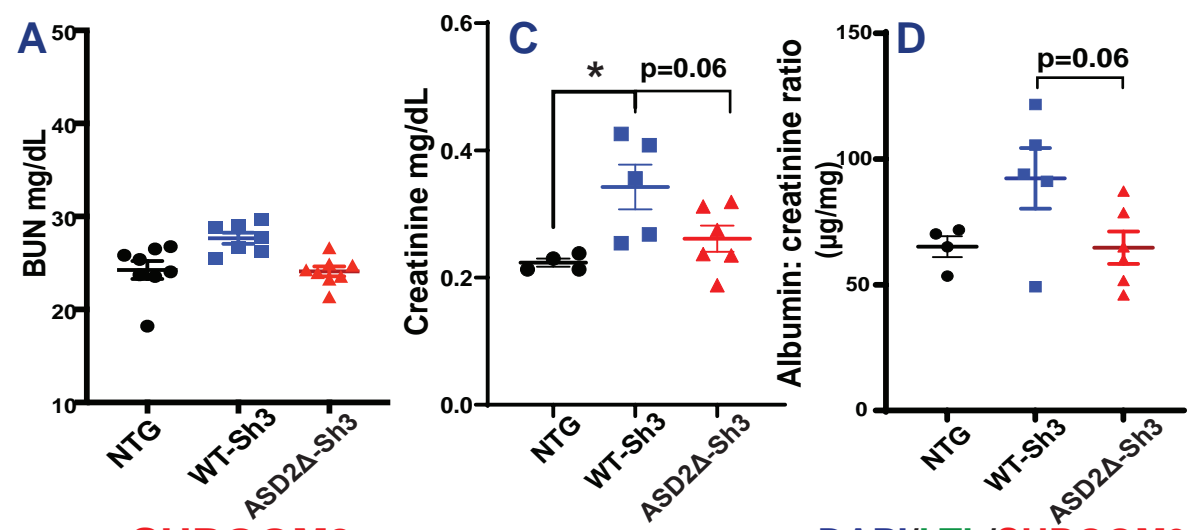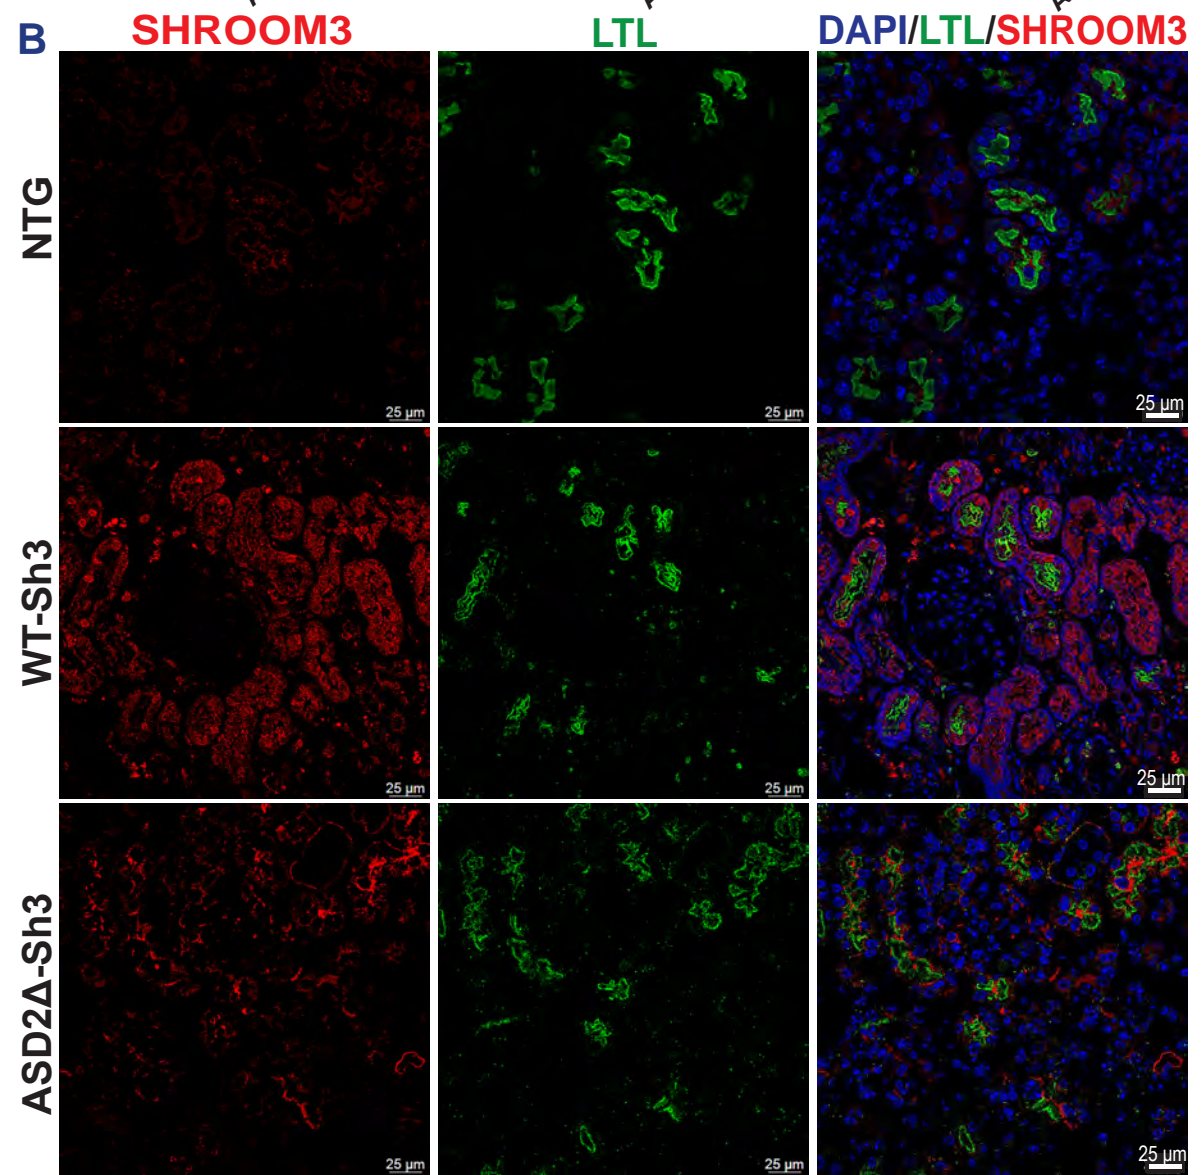

Supplement: media-2.pdf [file media-2.pdf]
